# Supplementary material for: Biotic rescaling reveals importance of species interactions for variation in biodiversity responses to climate change
Source: PubMed Central journal article supplement — Proc Natl Acad Sci U S A. 2020 Aug 31;117(37):22858–65. doi: 10.1073/pnas.2003377117 (PMC7502702; doi:10.1073/pnas.2003377117), 2020-08-31
Supplement: pnas.2003377117.sapp.pdf [file pnas.2003377117.sapp.pdf]

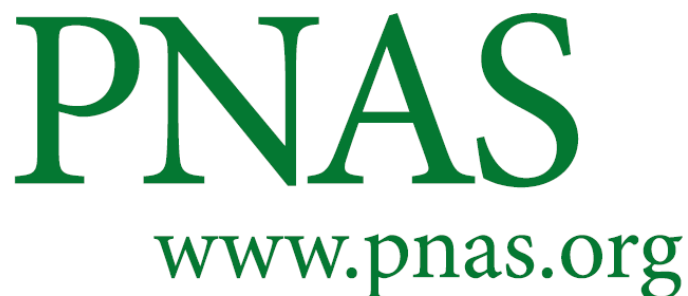

1  
2  
3  
4  
5  
6  
7  
8  
9  
10  
11  
12  
13  
14  
15  
16  
17  
18  
19  
20  
21  
22  
23  
24  
25  
26  
27  
28  
29  
30  
31  
32  
33  
34

**Supporting Information for: Biotic rescaling reveals importance of species interactions for variation in biodiversity responses to climate change cross landscapes**

By: **Vigdis Vandvik, Olav Skarpaas, Kari Klanderud, Richard J. Telford, Aud H. Halbritter, Deborah E. Goldberg**

Corresponding author: Vigdis Vandvik  
Email: [vigdis.vandvik@uib.no](mailto:vigdis.vandvik@uib.no)

**This PDF file includes:**

- Supplementary text
- Figures S1 to S3
- Tables S1 to S6
- SI References

**Other supplementary materials for this manuscript include the following:**

- Dataset S1
- Code C1

These data can be accessed in the following OSF project: Vandvik, V., Skarpaas, O., Klanderud, K., Telford, R. J., Halbritter, A. H., & Goldberg, D. E. Data for: Biotic rescaling reveals importance of species interactions for variation in biodiversity responses to climate change (Vandvik et al. 2020). Open Science Foundation (OSF). Retrieved from [osf.io/8y4mk](https://osf.io/8y4mk) August 7, 2020.

**35 Supplementary Information Text**

36

**37 Extended methods 1. Site selection and climate data**

38

39 The study was implemented as a replicated distributed experiment over twelve calcareous grassland sites  
40 in southern Norway. The sites were chosen to fit within a climate grid reflecting the major bioclimatic  
41 variation in the study region in southern Norway, with three temperature levels (Alpine, Sub-alpine,  
42 Boreal) replicated within each of four levels of precipitation (Figure 2, Table S1). We identified potential  
43 areas for sites with a combination of topographic maps, geological maps (NGU) and interpolated maps of  
44 summer temperature and annual precipitation normals 1960-90 (100 m resolution gridded data, met.no;  
45 see (1)(Tveito *et al.* 2005) and references therein). Subsequent on-site temperature and precipitation  
46 measurements at the twelve selected sites confirmed the regular spacing of the climate grid (see  
47 Extended methods 3. Climate grid confirmation).

48

49 Approximately 200 potential sites were visited and surveyed in the summer of 2008. Careful site selection  
50 ensured that other factors such as grazing regime and history, bedrock, vegetation type and structure,  
51 slope and exposure were kept as constant as possible among the selected sites (Klanderud *et al.* 2015).  
52 Geographical distance between sites averages 15 km and ranges from 650 m to 175 km. Within each  
53 site, the experiment is situated within a total area of 75 – 200 m<sup>2</sup>. All sites were moderately grazed prior to  
54 the experiment, but were fenced to avoid animal disturbance of the experimental installations. They were  
55 mowed annually for the duration of the experiment to mimic past disturbance regimes.

56

57 The vegetation is forb-rich semi-natural upland grassland vegetation, within the plant sociological  
58 association Potentillo-Festucetum ovinae tending towards Potentillo-Polygonium vivipara in the alpine  
59 sites and Nardo-Agrostion tenuis in some lowland sites (2)(Fremstad 1998). The most prevalent and  
60 common species in these systems are the graminoids *Agrostis capillaris*, *Anthoxanthum odoratum*,  
61 *Deschampsia cespitosa* and *Nardus stricta*, and the forbs *Achillea millefolium*, *Bistorta vivipara*, and  
62 *Potentilla erecta*.

63

64 Temperature was measured continuously at four heights (2 m and 30 cm above ground, at ground level,  
65 and 5 cm below ground), soil moisture was measured continuously with two replicate loggers ca. 5 cm  
66 below ground, and precipitation was measured at each site during the snow-free season at all twelve  
67 sites. For these measurements, we used Delta T GP1 loggers (Delta T devices, Cambridge, UK)  
68 equipped with two temperature probes, two SM 200 moisture sensors, and an ARG 100 tipping bucket  
69 (EML LTD, North Shields, UK) from 2009 onwards. UTL-3 version 3.0 temperature loggers (GEOTEST  
70 AG, Zollikofen, Switzerland) were used for measuring the 2 m and 30 cm temperatures. In addition, soil  
71 moisture was measured next to each turf, as the mean of four measurements taken along each side of  
72 the turf, two times during the growing season using a Delta T HH2 version 2.3 Moisture Meter with the  
73 same probe as for the GP1 logger. These data were used to assess and confirm the relevance of the  
74 climate grid for on-site climatic conditions (see Extended methods 3. climate grid confirmation).

75

76

77

**78 Extended methods 2. Experimental methods and vegetation data**

79

80 At each of the twelve sites we established five blocks, each containing a maximum of five 25 × 25 cm  
81 plots randomly designated to five different turf transplant treatments: transplanting to warmer, wetter, or  
82 warmer and wetter climates, transplanting within blocks (to control for the transplanting itself), and one  
83 untouched control turf. Thus, each transplanted plot has an “origin” site and a “destination” site (Figure 2).  
84 Comparison of transplanted turfs to origin controls assesses community change with climate change,  
85 while comparison of transplanted turfs to destination controls assesses degree of convergence to new  
86 climate. Prior to transplanting, we marked each corner of the plots with metal tubes and the upslope left-  
87 hand corner of each turf extracted from those plots with a plastic toothpick, ensuring permanent marked  
88 plots and that the turfs could be placed in the same orientation relative to the slope and block at the  
89 destination site. We used a knife to cut the turfs, and cut two cm outside the plot margins, giving turfs of

90 29 x 29 cm and to a depth below the rooting depth or at least 10 cm, unless the soil was shallower, as  
 91 was the case for some of the alpine plots. After excavation, the turfs were packed into 29 x 29 cm water-  
 92 proof carton boxes and transported to their respective target sites within one or two days. To keep the  
 93 transplant disturbance as similar as possible among treatments, the excavated control ('home transplant')  
 94 turfs were also kept in boxes while digging out the climate transplant plots, and put into their designated  
 95 target plots within the origin block before leaving the site. The transplantations were done at the end of  
 96 the growing season, in September 2009, to minimize impact.

97  
 98 Vegetation in each of the turfs was surveyed before transplantation in 2009 and in 2011, 2012, and 2013.  
 99 In 2010 we left the turfs to recover from any transient effects of the transplant process. Vegetation was  
 100 sampled at the peak of the growing season each year, i.e. mid-June, late June/July, and August for  
 101 Boreal, Sub-alpine and Alpine sites, respectively. We visually estimated percentage cover of all vascular  
 102 species in each plot. Nomenclature follows Lid & Lid (3). We also collected data on a number of  
 103 community attributes in each turf at each census, including percentage cover of all vascular species,  
 104 bryophytes, litter, and bare soil. We used a ruler at four fixed points in each turf to measure the mean  
 105 height of the vascular vegetation and of bryophytes. Graminoid cover and cover of new colonists were  
 106 calculated by summing cover of all appropriate species. New colonists were defined as all species not  
 107 present in the turf before transplantation. This sampling regime gave a total of 235 turfs and 940 turf  
 108 surveys, and included information on 181 vascular plant taxa.

109  
 110 Four out of 940 turf surveys were discarded due to physical damage by animals or rock fall. Due to the  
 111 extensive vegetation sampling over many years and involving many people, there is a risk of observer  
 112 errors. In particular, closely related and difficult-to-distinguish species and life stages such as sterile  
 113 graminoids might be confounded and/or some species might be overlooked in one or more of the  
 114 consecutive censuses of a particular turf. Such errors will result in pseudo-turnover in the community  
 115 data. To reduce the noise from such errors in our data, we thoroughly compared species records from  
 116 each of the turfs over the four years. During vegetation sampling, each plot was divided into 25 sub-turfs  
 117 and species and their reproductive status (with bud, flower, fruit or not) were recorded for each sub-turf.  
 118 Data on sub-turf occurrence and reproductive status are not used elsewhere in this paper, but were  
 119 extremely useful in the process of identifying observer errors. In many cases, we could assign  
 120 unidentified sterile individuals (typically, graminoids identified only to genus level) to a particular species if  
 121 the species' was flowering and thereby could be accurately identified to species in the same sub-turf the  
 122 year before or after. Similarly, we corrected obvious misidentifications of species that are difficult to  
 123 identify if the species were correctly identified in the same sub-turf in other years (as confirmed by  
 124 information on fertility and/or other data), and we corrected obviously overlooked perennial species in a  
 125 particular sub-turf in a particular year by adding the species to the list with an averaged percentage cover  
 126 from the year before and after the gap. As part of this pre-processing we also merged taxa that are often  
 127 sterile and so difficult to distinguish with confidence, such as for example *Alchemilla* spp. (excluding *A.*  
 128 *alpina*), *Euphrasia* spp. (*wettsteinii* and *stricta*), *Luzula* spp. (*multiflora* coll. and *sudetica*), *Pyrola* spp.,  
 129 *Sagina* spp. (*procumbens* and *saginoides*) and *Taraxacum* spp..

### 130 131 132 133 **Extended methods 3. Climate grid confirmation**

134  
 135 The climate grid (figure 2 in main text) was set up on the basis of downscaled climate data from the 1960  
 136 – 1990 normal period (0.1 km gridded data from The Norwegian Meteorological Institute; (Tveito *et al.*  
 137 2005)). In this supplement we explore weather data patterns measured locally at the SeedClim sites over  
 138 the study period to confirm the climate grid with ground-measured data (see Extended methods 1. Site  
 139 selection and climate).

#### 140 **1. Temperature**

141 Time series of monthly average temperature for boreal (dark red), sub-alpine (red) and alpine (orange)  
 142 sites measured at 2 m and 0 cm above ground and -5 cm below ground confirm that there are systematic  
 143 differences between the sites in temperature overall (left side), and especially during the four warmest

144 months (right side), over the six years for which we have logged climate data (see figure 2 and table S1  
 145 for information on the temperature levels):

146  
 147 Note that the differences are less clear during winter for the ground and soil measurements, which is  
 148 partly due to snow cover. Snow insulates the ground and soil from sub-zero temperatures, and our logger  
 149 data reflect this in that the temperature at the ground and soil level is close to zero for extended periods  
 150 during the winter, and can fall below zero when snow cover is lacking, especially at low-elevation sites  
 151 and early in the winter season.

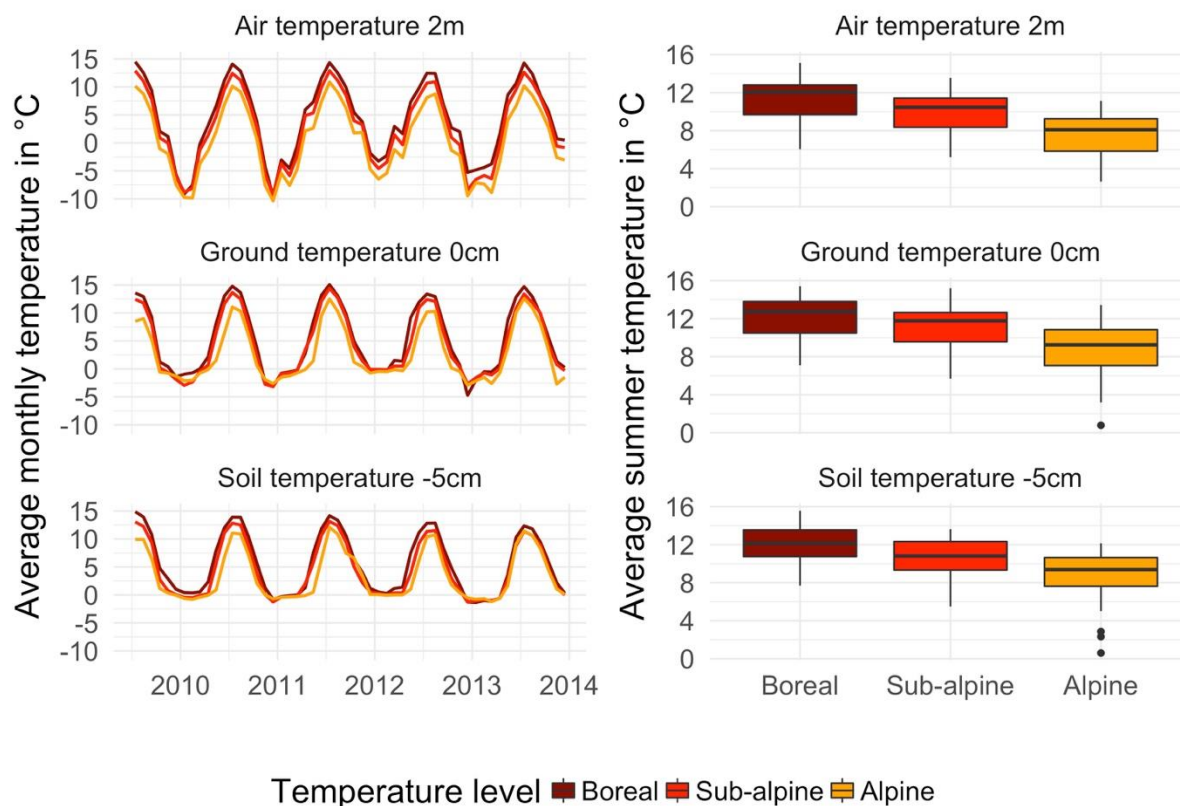

152

153 **2. Precipitation**

154 The logged precipitation data are much noisier than the temperature data (more missing values and  
 155 outliers), due to logger failure (due to economic constraints we did not have replicate tipping buckets  
 156 within sites, and so logger failure led to missing data) and also because precipitation falls as snow for a  
 157 large part of the year. Time series of sum of monthly precipitation for the 5 years of the experiment from  
 158 downscaled gridded data (0.1 km grid, www.met.no), averaged across sites for each precipitation level  
 159 according to increasing precipitation levels, from light (1) to dark (4) blue, confirm systematic differences  
 160 between the sites in precipitation over the study period (left side). The same trend across precipitation  
 161 level can be seen for the sum of annual precipitation across the 5 years of the experiment (right side):

162  
 163  
 164  
 165  
 166  
 167  
 168  
 169  
 170

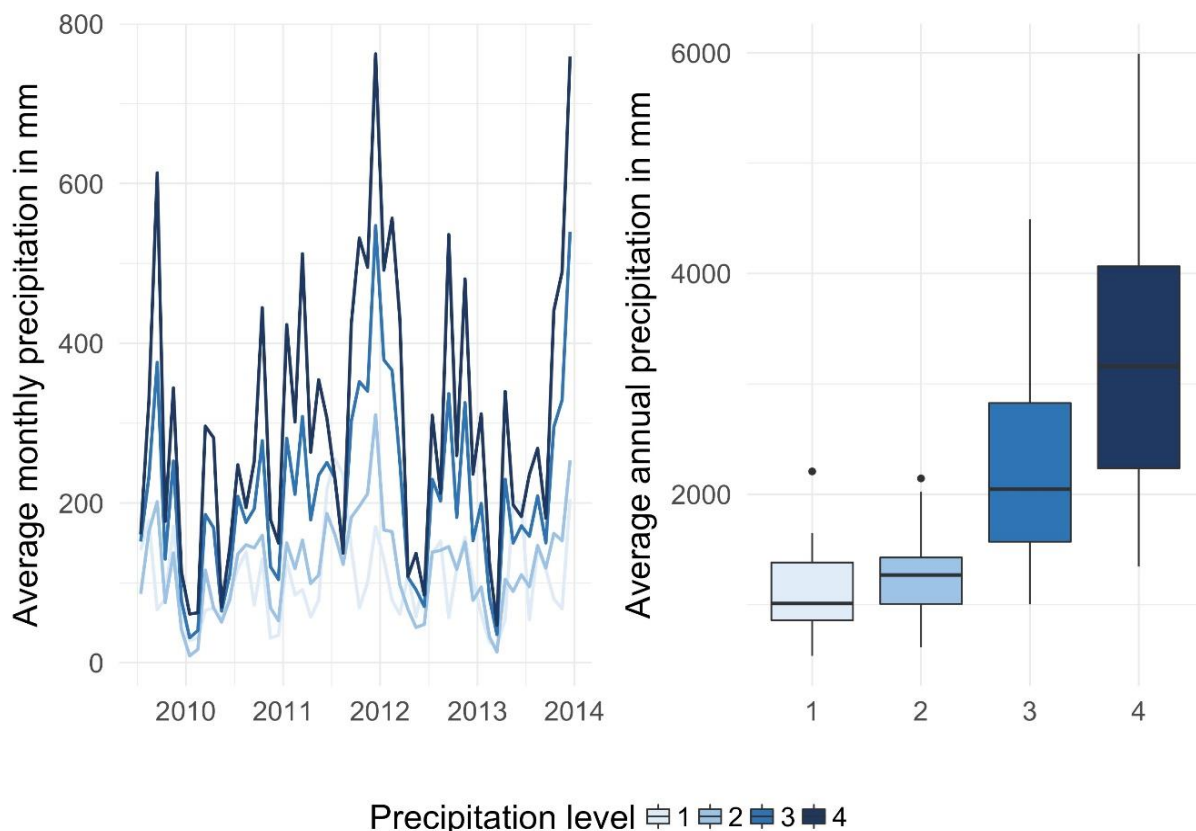

171 Note that the variation in annual precipitation increases towards the wetter end of the climate grid (for site  
 172 placement in the climate grid, see Figure 2 and Table S1).  
 173

174 **3. Soil moisture**

175 Average monthly soil moisture for the four warmest months are shown below for precipitation levels from  
 176 the driest (light blue) to the wettest (dark blue). The shape of the symbols represent the temperature  
 177 levels. The soil moisture data broadly confirm the general trend in the grid but are also highly variable.  
 178 This is partly because soil moisture is strongly affected by fine-scale heterogeneity in the soil, and was  
 179 only measured by two replicate loggers at each site. Soil moisture data was only available from 2010-  
 180 2012, due to widespread logger failure in 2013:

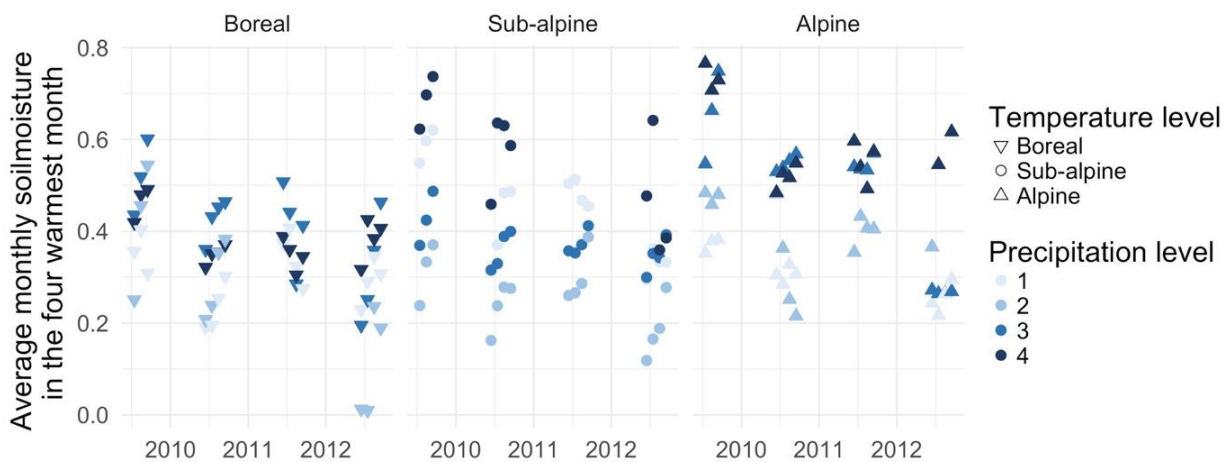

183 4. *Climate grid*

184 We used downscaled gridded data provided by The Norwegian Meteorological Institute to compare the  
 185 weather in the five years of the experiments (2009-2013; closed symbols) to the 30-year normal used to  
 186 establish the experimental climate grid (1960-90 open symbols). Data below are mean annual  
 187 precipitation and mean annual tetraterm temperatures (averages of the four-month period June-  
 188 September)  $\pm$  SE (vertical and horizontal error bars, respectively):  
 189

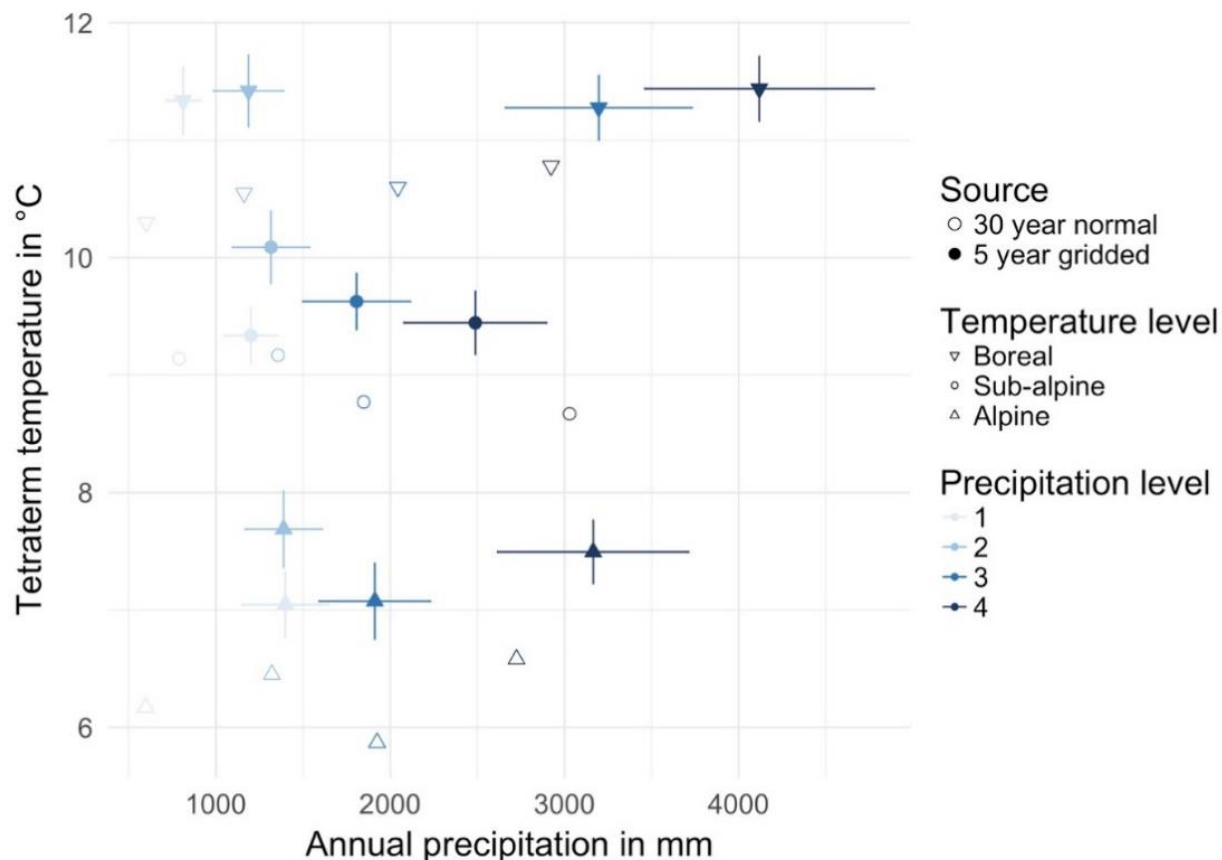

190  
 191  
 192  
 193 Tetraterm temperature increases from alpine to boreal sites and precipitation increases from dry to the  
 194 wet sites, but with considerable year to year variation, especially in precipitation. Interestingly, the annual  
 195 precipitation and tetraterm temperature show that the climate has been consistently both warmer and  
 196 wetter during the experiment than in the 1960-1990 normal period, paralleling the longer-term climate  
 197 change projections for this region. These changes are especially pronounced in the warmer and wetter  
 198 parts of the grid (Boreal 3 and Boreal 4; see Figure 2 and Table S1).

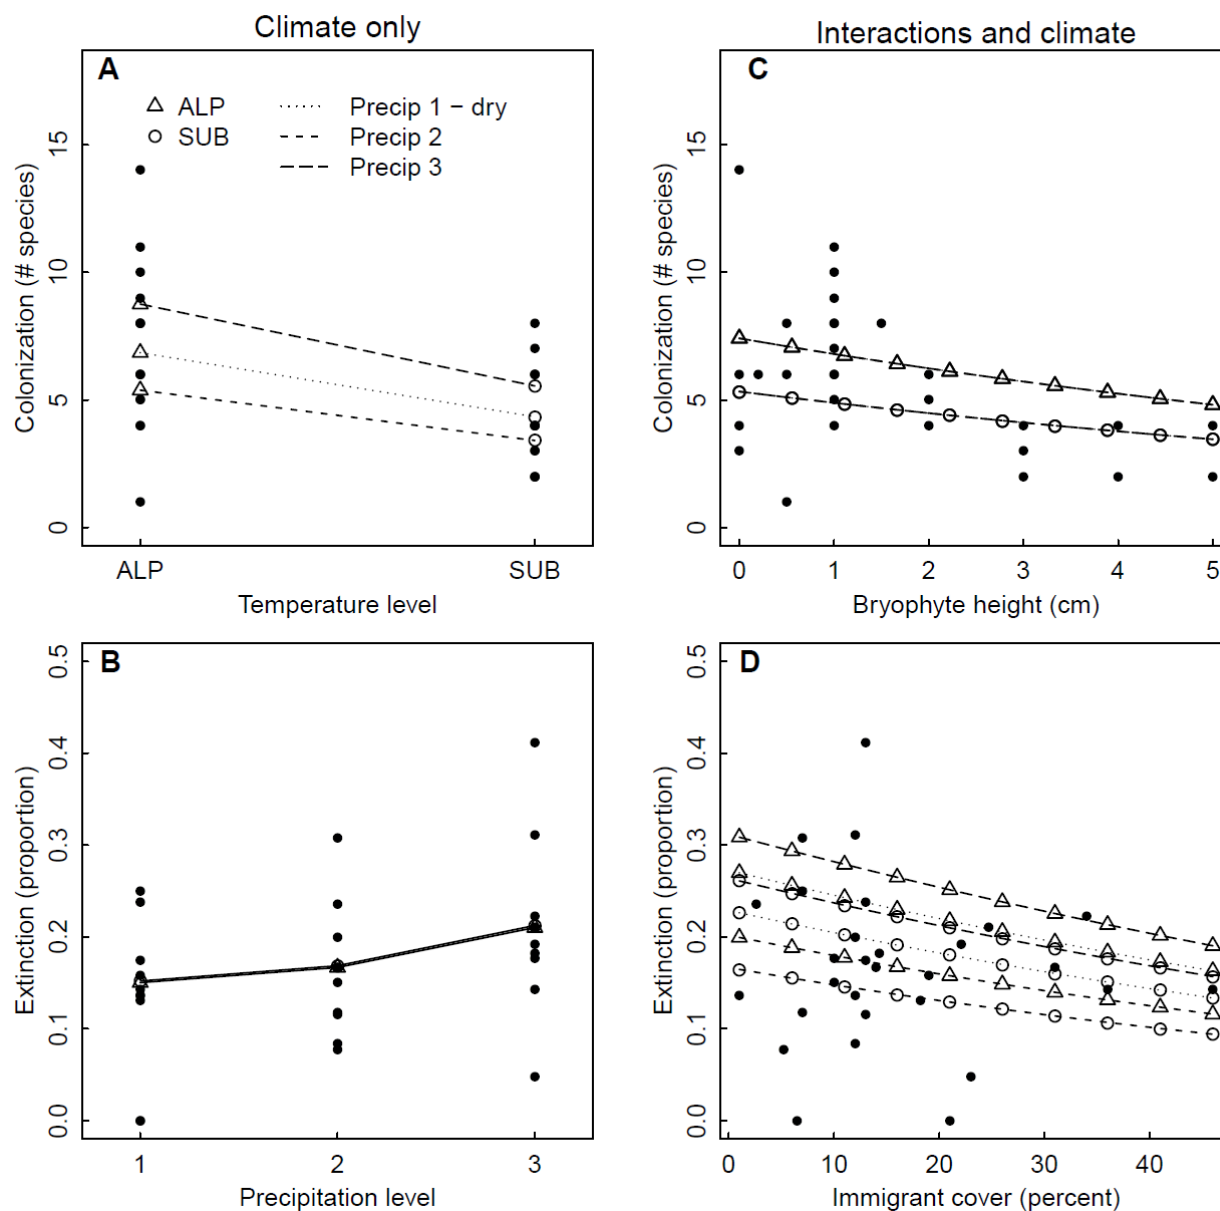

199  
 200  
 201 **Figure S1. Background plot-level colonization and extinction rates in response to climate context**  
 202 **(A, B) and biotic interactions (C, D)** based on a series of GLMs of the full factorial data. Colonization  
 203 rate is expressed as the number of new species colonizing the control plots between 2009 and 2013.  
 204 Extinction rate is expressed as the proportion of the original species disappearing from the control plots  
 205 between 2009 and 2013. For biotic interactions, these background colonization and extinction rates are  
 206 plotted against two of the community metrics tested; coefficients for other significant community metrics  
 207 see Figure S2 and results text. Black dots (n=60) represent the five replicate plots for each control and  
 208 local transplant treatment in the six sites in which all climate change treatments are represented. Within  
 209 each panel, symbols and line types indicate the climatic context (temperature and precipitation levels; see  
 210 legend on panel A). In cases where the climatic contexts are not significant (Table S4), the associated  
 211 symbols, or line types are not differentiated on the panel.

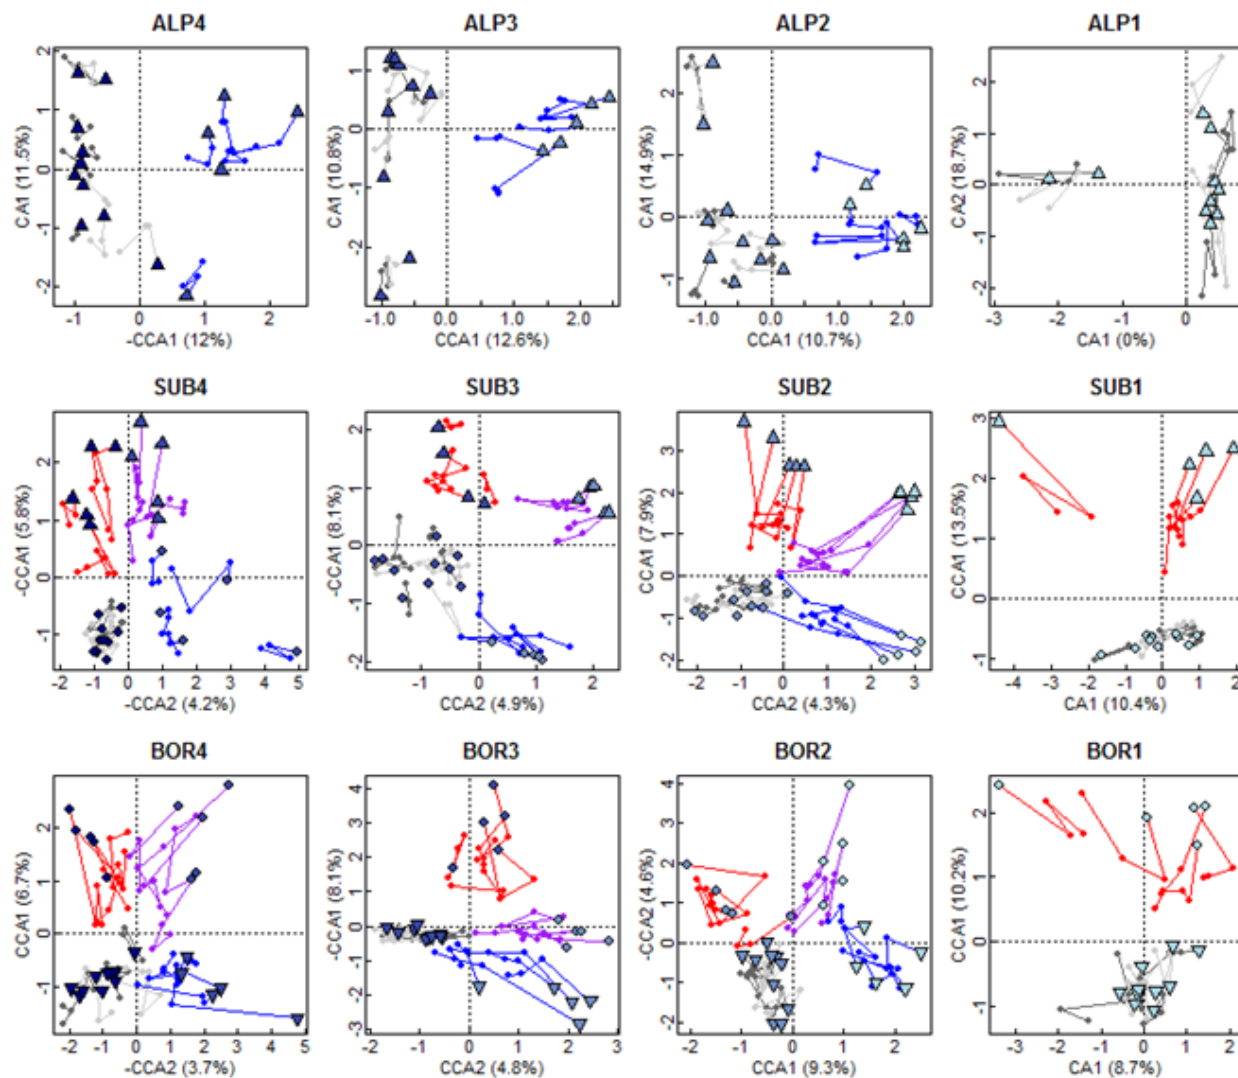

212  
 213  
 214 **Figure S2. Community response to experimental transplantation to warmer (red) wetter (blue) and**  
 215 **warmer and wetter (purple) across the 12 study sites.** Controls and local transplants are shown in  
 216 gray. Based on constrained canonical ordination analysis (CCA; warming and wetting treatments as axis  
 217 constraints) of plot-level plant communities at each site, with axes fitted to data on initial community  
 218 composition (2009) and turfs plotted as mean species scores for each treatment in 2009 (symbols  
 219 according to source site as in Figure 2) and lines for the three subsequent years (2011, 2012 and 2013;  
 220 colors according to treatment; see Figure 2). The plots are rotated to match the orientation of the grid  
 221 (Figure 2; reversed axes are indicated by '-' in front of the axis label). For further site and treatment  
 222 information, see Figure 2 and Table S1. Percentages indicate the % deviance accounted for by each axis.  
 223 Eigenvalues for each axis are given in Table S3.



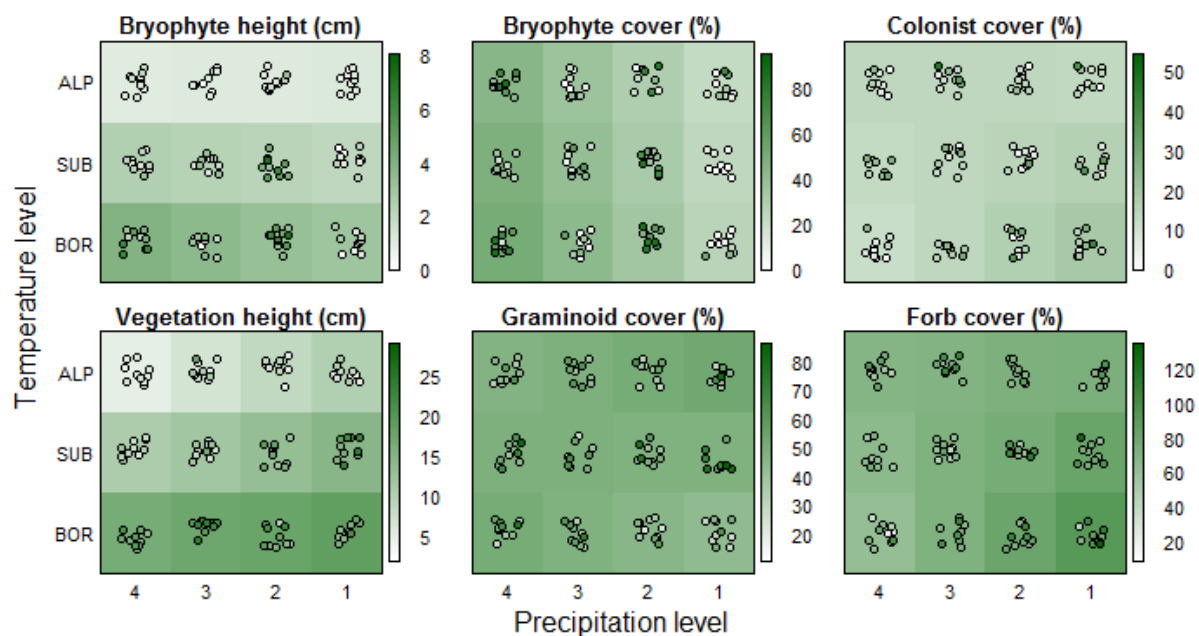

224  
 225  
 226 **Figure S3. Variation in background levels of the biotic proxies used in models of biotic**  
 227 **interactions across the climate grid.** Dots indicate observed values for 5 control and 5 local transplant  
 228 plots per site, the background colours indicates the regression model across the climate grid (see Figure  
 229 2). The biotic interactions were relatively uncorrelated with each other ( $r < 0.3$ ) except that bryophyte  
 230 height was positively correlated with bryophyte cover ( $r=0.51$ ,  $p < 0.001$ ) and vegetation height ( $r = 0.36$ ,  
 231  $p < 0.001$ ), and forb cover was positively correlated with colonist species ( $r = 0.32$ ,  $p < 0.001$ ).

**Table S1. Geographic and climatic information for the 12 field sites.** The table includes site codes, biogeographic classification into zones and sections(4) (Moen & Odland 1998), site names, longitudes and latitudes (in degrees), elevations (in meters above sea level), precipitation (in the three classes used in this paper and in millimeters per year) and growth season temperature (in the three classes used in this paper and in mean temperature of the four warmest months; June – September). Temperature and precipitation data are according to the 1960-1990 normal period data from the Norwegian Meteorological Institute.

| Code | Biogeographic classification |          | Site name        | Longitude<br>(°E) | Latitude<br>(°N) | Elevation<br>(m. a. s. l) | Precipitation |      | Temperature |       |
|------|------------------------------|----------|------------------|-------------------|------------------|---------------------------|---------------|------|-------------|-------|
|      | Zones                        | Sections |                  |                   |                  |                           | level         | (mm) | level       | (°C)  |
| ALP1 | Low-Alpine                   | O2       | Ulvhaugen        | 61.0243           | 8.12343          | 1208                      | 1             | 596  | ALP         | 6.17  |
| ALP2 | Low-Alpine                   | O1       | Låvisdalen       | 60.8231           | 7.27596          | 1097                      | 2             | 1321 | ALP         | 6.45  |
| ALP3 | Low-Alpine                   | O1       | Gudmesdalen      | 60.8328           | 7.17561          | 1213                      | 3             | 1925 | ALP         | 5.87  |
| ALP4 | Low-Alpine                   | OC       | Skjellingahaugen | 60.9335           | 6.41504          | 1088                      | 4             | 2725 | ALP         | 6.58  |
| SUB1 | Sub-Alpine                   | O2       | Årust            | 60.8203           | 8.70466          | 815                       | 1             | 789  | SUB         | 9.14  |
| SUB2 | Sub-Alpine                   | O1       | Høgsete          | 60.8760           | 7.17666          | 700                       | 2             | 1356 | SUB         | 9.17  |
| SUB3 | Sub-Alpine                   | O1       | Rambæra          | 61.0866           | 6.63028          | 769                       | 3             | 1848 | SUB         | 8.77  |
| SUB4 | Sub-Alpine                   | OC       | Veskre           | 60.5445           | 6.51468          | 797                       | 4             | 3029 | SUB         | 8.67  |
| BOR1 | North-Boreal                 | O2       | Fauske           | 61.0355           | 9.07876          | 589                       | 1             | 600  | BOR         | 10.30 |
| BOR2 | North-Boreal                 | O1       | Vikesland        | 60.8803           | 7.16982          | 474                       | 2             | 1161 | BOR         | 10.55 |
| BOR3 | North-Boreal                 | O1       | Arhelleren       | 60.6652           | 6.33738          | 431                       | 3             | 2044 | BOR         | 10.60 |
| BOR4 | North-Boreal                 | OC       | Øvstedal         | 60.6901           | 5.96487          | 346                       | 4             | 2923 | BOR         | 10.78 |

**Table S2. Descriptive statistics of all candidate variables for proxies of biotic interactions.** Means and standard deviations (SD) across all sites, plots, and years. N=940.

| <b>Variable</b>   | <b>unit</b> | <b>Mean</b> | <b>SD</b> |
|-------------------|-------------|-------------|-----------|
| Graminoid cover   | proportion  | 0.459       | 0.175     |
| Forb cover        | proportion  | 0.658       | 0.172     |
| Colonist cover    | proportion  | 0.274       | 0.172     |
| Vegetation height | m           | 0.111       | 0.061     |
| Bryophyte cover   | proportion  | 0.319       | 0.260     |
| Bryophyte height  | m           | 0.024       | 0.019     |

**Table S3. Eigenvalues of the primary constrained axes (CCA) and unconstrained axes (CA) in the site-wise ordinations (Figure S2).** For site information, see Figure 2 and Table S1.

| <b>Site</b> | <b>CCA1</b> | <b>CCA2</b> | <b>CA1</b> | <b>CA2</b> |
|-------------|-------------|-------------|------------|------------|
| ALP1        | -           | -           | 0.268      | 0.162      |
| ALP2        | 0.230       | -           | 0.320      | 0.182      |
| ALP3        | 0.351       | -           | 0.303      | 0.227      |
| ALP4        | 0.275       | -           | 0.264      | 0.204      |
| SUB1        | 0.414       | -           | 0.319      | 0.289      |
| SUB2        | 0.319       | 0.174       | 0.386      | 0.280      |
| SUB3        | 0.354       | 0.216       | 0.344      | 0.293      |
| SUB4        | 0.238       | 0.171       | 0.329      | 0.272      |
| BOR1        | 0.280       | -           | 0.238      | 0.233      |
| BOR2        | 0.380       | 0.188       | 0.333      | 0.229      |
| BOR3        | 0.279       | 0.166       | 0.287      | 0.225      |
| BOR4        | 0.279       | 0.156       | 0.375      | 0.316      |

## Supplementary to Vandvik et al. (2020): Biotic rescaling of climate change

**Table S4. Coefficients from models of colonization** (number of new species; Poisson regression) **and extinction** (proportion of possible extinctions; logistic regression) based on only climate variables (climate change, climate context, and climate context-dependency), or climate and biotic interactions (see Figure S3). Climate models are full models containing all climate variables. Biotic interaction models were constructed using forward selection, based on AIC, within two groups of variables which were combined as follows: First, we included variables representing biotic interactions, then main effects for climate change or context, and lastly climate interactions. Any selected interaction terms involving biotic interactions were included with those main effects. See Figure 5 for overview and Table S5 for details of deviances explained per model and variable group, and Figure 4 for illustration of some model predictions. The temperature and precipitation levels (TL\_SUB; PL\_2 and PL\_3) specify the contrast to the lowest level within each variable, see Figure 2 and Table S1. Full factorial dataset,  $n = 150$ . NA = not relevant in this model, - = no significant effect. + =  $p < 0.1$ , \* =  $p < 0.05$ , \*\* $p < 0.01$ , \*\*\* $p < 0.001$ .

Supplementary to Vandvik et al. (2020): Biotic rescaling of climate change

| Variable group             | Parameters                     | Colonization |                     | Extinction |                     |
|----------------------------|--------------------------------|--------------|---------------------|------------|---------------------|
|                            |                                | Climate      | Biotic interactions | Climate    | Biotic interactions |
|                            | Intercept                      | 1.92 ***     | 1.79 ***            | -1.73 ***  | -1.37 ***           |
| Climate change             | Warmer                         | 0.75 ***     | 0.56 ***            | 0.95 ***   | 0.44 *              |
|                            | Wetter                         | 0.11         | 0.33 **             | 0.76 **    | 0.34 +              |
|                            | Warmer&Wetter                  | 0.45 *       | 0.70 ***            | 1.47 ***   | 0.67 ***            |
| Climate context            | TL_SUB                         | -0.46 **     | -0.33 +             | 0.01       | -0.23 +             |
|                            | PL_2                           | -0.24        | -                   | 0.12       | -0.39 **            |
|                            | PL_3                           | 0.25         | -                   | 0.41       | 0.19                |
| Climate context-dependency | Warmer : TL_SUB                | 0.21         | 0.20                | -0.61 *    | -                   |
|                            | Wetter : TL_SUB                | 0.57 **      | 0.59 **             | 0.26       | -                   |
|                            | Warmer&Wetter : TL_SUB         | -0.20        | -0.13               | 0.17       | -                   |
|                            | Warmer : PL_2                  | -0.24        | -                   | 0.25       | -                   |
|                            | Wetter : PL_2                  | 0.55 *       | -                   | -1.17 **   | -                   |
|                            | Warmer&Wetter : PL_2           | 0.44 +       | -                   | -1.14 ***  | -                   |
|                            | Warmer : PL_3                  | -0.54 *      | -                   | -0.37      | -                   |
|                            | Wetter : PL_3                  | 0.01         | -                   | -0.71 *    | -                   |
|                            | Warmer&Wetter : PL_3           | -0.12        | -                   | -0.92 **   | -                   |
| Biotic interactions        | Bryophyte height               | NA           | -0.16 ***           | NA         | 0.35 ***            |
|                            | Bryophyte cover                | NA           | -                   | NA         | -0.03               |
|                            | Vegetation height              | NA           | 0.00                | NA         | -                   |
|                            | Graminoid cover                | NA           | 0.03                | NA         | -                   |
|                            | Forb cover                     | NA           | 0.05                | NA         | -                   |
|                            | Colonist cover                 | NA           | -                   | NA         | -0.25               |
|                            | Warmer : Colonist cover        | NA           | -                   | NA         | 0.69 **             |
|                            | Wetter : Colonist cover        | NA           | -                   | NA         | 0.42 +              |
|                            | Warmer&Wetter : Colonist cover | NA           | -                   | NA         | 0.30                |

**Table S5. Deviances and AIC from models of colonization** (number of new species; Poisson regression) **and extinction** (proportion of possible extinctions; logistic regression) based on only climate variables (climate change, climate context, and climate context-dependency), or climate and biotic interactions (see Figure S2). See Table S4 for details on the model specification, Figure 5 for an overview of deviances explained per model and variable group, and Figure 4 for some model predictions. Full factorial dataset, n = 150. NA = not relevant in this model.

| Variable group                    | Parameters           | Colonization |                     | Extinction |                     |
|-----------------------------------|----------------------|--------------|---------------------|------------|---------------------|
|                                   |                      | Climate      | Biotic interactions | Climate    | Biotic interactions |
| <b>Climate change</b>             | TTtreat              | 46.0         | 60.8                | 48.5       | 9.2                 |
| <b>Climate context</b>            | T_level              | 21.2         | 2.6                 | 0.1        | 4.1                 |
|                                   | P_level              | 1.7          | -                   | 11.8       | 11.2                |
| <b>Climate context-dependency</b> | TTtreat:T_level      | 21.2         | 19.3                | 12.8       | -                   |
|                                   | TTtreat:P_level      | 23.7         | -                   | 37.1       | -                   |
| <b>Biotic interactions</b>        | BryophyteHeight      | NA           | 17.6                | NA         | 26.2                |
|                                   | BryophyteCover       | NA           | -                   | NA         | 2.6                 |
|                                   | VegetationHeight     | NA           | 2.6                 | NA         | -                   |
|                                   | GraminoidCover       | NA           | 2.7                 | NA         | -                   |
|                                   | ForbCover            | NA           | 3.0                 | NA         | -                   |
|                                   | ColonistCover        | NA           | -                   | NA         | 49.6                |
|                                   | Ttreat:ColonistCover | NA           | -                   | NA         | 14.6                |
| <b>Model assessment</b>           | Residual deviance    | 94.8         | 100.1               | 168.3      | 161.1               |
|                                   | Null deviance        | 208.8        | 208.8               | 278.6      | 278.6               |
|                                   | AIC                  | 588.7        | 586.0               | 545.0      | 531.8               |

**Table S6. Coefficients from models of the candidate proxies of biotic interactions across the climate grid.** The best models were constructed using forward selection amongst the main and interactive effects of temperature and precipitation contexts, based on AIC. Only integrators retained in either the colonization or the extinction models (Table S4) are included here. Analyses are based on the 2013 vegetation survey data of the control and local transplant plots, n = 120. - = no significant effect. + = p<0.1, \* = p<0.05, \*\*p<0.01, \*\*\*p<0.001.

|                           | Bryophyte<br>height (cm) | Bryophyte<br>cover (%) | Colonist<br>cover (%) | Vegetation<br>height (cm) | Graminoid<br>cover (%) | Forb cover<br>(%) |
|---------------------------|--------------------------|------------------------|-----------------------|---------------------------|------------------------|-------------------|
| <b>Full model</b>         |                          |                        |                       |                           |                        |                   |
| Intercept                 | -0.92 +                  | -0.79                  | -0.47                 | -0.67                     | 0.87                   | -0.52             |
| Temperature               | 0.38                     | 0.05                   | 0.37                  | 0.60 **                   | -0.46 +                | 0.62 *            |
| Precipitation             | -0.13                    | 0.24                   | 0.13                  | -0.40 **                  | -0.27                  | 0.11              |
| Temperature:Precipitation | 0.10                     | 0.02                   | -0.12                 | 0.10                      | 0.15                   | -0.20 *           |
| <b>Best model</b>         |                          |                        |                       |                           |                        |                   |
| Intercept                 | -1.24 ***                | -0.69 **               | 0.00 ***              | -1.14 ***                 | 0.87                   | -0.52             |
| Temperature               | 0.62 ***                 | -                      | -                     | 0.84 ***                  | -0.46 +                | 0.62 *            |
| Precipitation             | -                        | 0.27 ***               | -                     | -0.21 ***                 | -0.27                  | 0.11              |
| Temperature:Precipitation | -                        | -                      | -                     | -                         | 0.15                   | -0.20 *           |

## Supplementary to Vandvik et al. (2020): Biotic rescaling of climate change

### SI references:

1. O. E. Tveito, I. Bjørndal, A. O. Skjelvåg, B. Aune, A GIS-based agro-ecological decision system based on gridded climatology. *Meteorological Applications* **12**, 57–68 (2005).
2. E. Fremstad, *Vegetasjonstyper i Norge*, 2. opplag (NINA, Norsk Institutt for Naturforskning, 1998).
3. J. Lid, D. T. Lid, *Norsk flora* (Samlaget, 2005) (August 19, 2020).
4. A. Moen, A. Odland, *National Atlas for Norway: Vegetation* (Norges geografiske oppmåling, Statens kartverk, 1999) (August 19, 2020).
